# Supplementary material for: Gene expression profiling in non-human primate jejunum, ileum and colon after total-body irradiation: a comparative study of segment-specific molecular and cellular responses
Source: PubMed Central journal article supplement (PMC4654820; doi:10.1186/s12864-015-2168-y), 2015-11-21
Supplement: 12864_2015_2168_MOESM2_ESM.pdf [file 12864_2015_2168_MOESM2_ESM.pdf]

Table S2. Altered genes regulating granulocyte adhesion and diapedesis in jejunum, ileum and colon at days 4, 7 and 12 after 6.7 Gy and 7.4 Gy TBI.

| Symbol    | Jejunum |        |        |        |        |        | Ileum |       |        |       |        |        | Colon   |        |        |         |       |        |
|-----------|---------|--------|--------|--------|--------|--------|-------|-------|--------|-------|--------|--------|---------|--------|--------|---------|-------|--------|
|           | A1      | A2     | A3     | A4     | A5     | A6     | A1    | A2    | A3     | A4    | A5     | A6     | A1      | A2     | A3     | A4      | A5    | A6     |
| CCL2      | ↑5.54   |        |        | ↑6.37  | ↑2.70  |        | ↑3.29 |       |        | ↑3.67 |        | ↑2.21  | ↑3.82   | ↑2.45  |        | ↑5.32   |       |        |
| CCL3      | ↑3.34   |        |        | ↑4.18  |        |        |       |       |        |       |        |        | ↑2.22   |        |        | ↑3.26   |       | ↑2.04  |
| CCL8      |         | ↑2.69  | ↑3.95  |        |        | ↑3.00  |       |       |        |       |        |        |         | ↑3.25  |        | ↑3.40   |       |        |
| CCL11     |         |        |        |        |        |        |       |       |        |       |        |        | ↑2.88   |        |        | ↑3.41   |       |        |
| CCL17     |         |        |        |        |        |        |       |       |        |       |        |        |         |        |        | ↑3.80   |       |        |
| CCL18     |         |        |        | ↑2.33  |        |        |       |       |        |       |        |        | ↓-2.39  | ↓-3.46 |        | ↓-2.88  |       |        |
| CCL19     | ↑13.21  |        |        | ↑12.84 |        |        | ↑7.10 | ↑2.78 |        | ↑5.26 |        |        |         |        |        | ↑5.70   |       |        |
| CCL20     | ↑6.63   |        | ↑8.58  |        |        |        |       |       |        |       |        |        | ↑9.16   | ↑3.07  |        | ↑11.51  | ↑4.51 |        |
| CCL21     | ↑2.99   |        |        | ↑3.20  |        |        | ↑2.49 |       |        | ↑2.35 |        |        |         |        |        |         |       |        |
| CCL23     |         |        |        |        |        |        |       |       |        |       |        |        | ↑16.50  |        |        | ↑31.68  |       |        |
| CCL24     |         |        |        |        |        |        |       |       |        |       |        |        |         |        |        | ↓-2.21  |       |        |
| CCL26     |         |        |        |        |        |        |       |       |        |       |        |        |         |        |        | ↑2.80   |       |        |
| CDH5      |         |        |        | ↑2.15  |        |        |       |       |        |       |        |        |         |        |        | ↑2.05   |       |        |
| CLDN1     |         |        |        |        |        |        |       |       |        |       |        |        | ↑2.08   |        |        | ↑2.35   |       |        |
| CLDN2     |         |        |        |        |        |        |       |       |        |       |        |        | ↑105.58 | ↑13.85 |        | ↑195.71 |       |        |
| CLDN3     |         |        |        |        |        |        |       |       |        |       |        |        |         |        |        | ↓-2.77  |       |        |
| CLDN4     |         |        |        |        |        |        |       |       |        |       |        |        |         |        |        | ↓-2.29  |       |        |
| CLDN7     |         |        |        |        |        |        |       |       |        |       |        |        |         |        |        | ↓-2.16  |       |        |
| CLDN8     |         |        |        |        |        |        |       |       |        |       |        |        |         |        |        | ↓-19.54 |       |        |
| CSF3R     |         |        |        |        |        |        |       |       |        |       |        |        | ↑2.58   |        |        | ↑3.13   |       |        |
| CXCL1     | ↑14.69  |        |        | ↑6.28  |        |        |       |       |        | ↑4.17 |        |        | ↑13.66  | ↑3.04  |        | ↑18.31  |       |        |
| CXCL2     | ↑8.67   |        |        | ↑10.45 |        |        |       |       |        |       |        |        | ↑15.03  | ↑4.80  |        | ↑20.20  |       |        |
| CXCL3     | ↑2.89   |        |        |        |        |        |       |       |        | ↑2.32 |        |        | ↑8.12   | ↑2.19  |        | ↑10.90  |       |        |
| CXCL6     |         |        |        |        |        |        |       |       |        |       |        |        | ↑2.77   |        |        | ↑2.65   |       |        |
| CXCL8     |         |        |        | ↑7.11  |        |        |       |       |        | ↑3.96 |        |        | ↑60.90  | ↑11.78 | ↑3.01  | ↑55.79  |       | ↑8.20  |
| CXCL10    | ↑5.07   | ↑6.02  |        |        |        | ↑9.97  |       |       |        | ↑3.83 |        | ↑10.95 | ↑4.15   |        |        | ↑13.61  |       |        |
| CXCL11    | ↑4.00   |        |        |        |        |        |       |       | ↑3.622 | ↑3.83 | ↑2.94  | ↑10.14 | ↑9.53   |        |        | ↑33.63  |       |        |
| CXCL16    |         |        |        |        |        |        |       |       |        |       |        |        | ↑3.31   |        |        | ↑4.52   |       |        |
| CXCL17    |         |        |        |        |        |        |       |       |        |       |        |        | ↑12.20  |        |        | ↑31.43  |       |        |
| IL37      |         | ↓-3.42 |        |        | ↓-5.68 |        |       |       |        |       |        |        |         |        |        |         |       |        |
| IL1A      |         |        |        |        |        |        |       |       |        |       |        |        | ↑13.52  | ↑5.08  |        | ↑34.03  |       | ↑3.04  |
| IL1B      |         |        |        |        |        |        |       |       |        |       |        |        |         |        |        | ↑4.77   |       |        |
| ITGA2     |         |        |        |        |        |        |       |       |        |       |        |        |         |        |        | ↑3.00   |       |        |
| ITGA6     |         |        |        |        |        |        |       |       |        |       |        |        |         |        |        | ↑2.19   |       |        |
| MMP2      | ↑2.47   |        |        | ↑2.87  |        |        | ↑2.30 |       |        | ↑3.13 |        |        | ↑2.61   |        |        | ↑2.92   |       |        |
| MMP3      |         |        |        |        |        |        |       |       |        |       |        |        |         |        |        | ↑2.45   |       |        |
| MMP7      |         |        |        |        |        |        |       |       |        |       |        |        | ↑10.94  |        |        | ↑41.21  |       |        |
| MMP9      |         |        |        |        |        |        |       |       |        |       |        |        | ↑4.55   |        |        | ↑2.86   |       |        |
| MMP15     |         |        |        |        |        |        |       |       |        |       |        |        |         |        |        | ↓-2.10  |       |        |
| MMP28     |         |        |        |        |        |        |       |       |        |       |        |        |         |        |        | ↓-2.11  |       |        |
| MSN       |         | ↓-2.11 | ↓-2.12 |        | ↓-2.29 | ↓-2.60 |       |       | ↓-2.36 |       | ↓-2.03 |        |         |        | ↓-2.12 | ↓-2.62  |       |        |
| PF4       |         |        |        |        |        |        |       |       | ↓-4.85 |       |        | ↓-5.77 | ↑9.52   |        |        | ↑13.76  |       | ↓-3.51 |
| SDC3      | ↑2.08   |        |        |        |        |        |       |       |        |       |        |        | ↑2.42   |        |        | ↑3.06   |       |        |
| SELL      |         |        |        |        |        |        |       |       |        |       |        |        |         |        |        | ↑4.06   |       |        |
| SELP      |         |        |        |        |        |        |       |       |        |       |        |        |         |        |        | ↑2.09   |       |        |
| TNF       |         |        |        |        |        |        |       |       |        |       |        |        |         |        |        | ↑2.40   |       |        |
| TNFRSF11B | ↑2.59   |        |        | ↑2.31  |        |        |       |       |        |       |        |        | ↑2.98   |        |        | ↑2.70   |       |        |
| VCAM1     | ↑2.55   |        |        | ↑2.99  |        |        |       |       |        |       |        |        | ↑2.64   |        |        | ↑2.54   |       |        |
